# Supplementary material for: 6-Shogaol, an Active Component of Ginger, Inhibits p300 Histone Acetyltransferase Activity and Attenuates the Development of Pressure-Overload-Induced Heart Failure
Source: MDPI journal article supplement (doi:10.3390/nu15092232), 2023-05-08
Supplement: s1 [file s1]

**Table S1.** Ecocardiographic parameters of sham and TAC mice. Mean  $\pm$  SEM of 10 mice from each sham and TAC group. Abbreviations: HW, heart weight; IVSd, interventricular septum thickness at end-diastole; LVIDd, left ventricular internal diameter end-diastole; LVPWd, left ventricular posterior wall diameter, LVMI; left ventricular mass index; EF, ejection fraction.

| Parameter   | Sham<br>Vehicle |            | TAC<br>Vehicle |                          | 6-shogaol 0.2 mg/kg |                          | 6-shogaol 1 mg/kg |                          |
|-------------|-----------------|------------|----------------|--------------------------|---------------------|--------------------------|-------------------|--------------------------|
| HW (mg)     | 117.7           | $\pm$ 1.2  | 185.7          | $\pm$ 8.2 <sup>**</sup>  | 172.9               | $\pm$ 3.8                | 141.1             | $\pm$ 4.0 <sup>##</sup>  |
| IVSd (mm)   | 1.24            | $\pm$ 0.02 | 1.71           | $\pm$ 0.05 <sup>**</sup> | 1.45                | $\pm$ 0.08 <sup>#</sup>  | 1.46              | $\pm$ 0.04 <sup>#</sup>  |
| LVIDd (mm)  | 2.31            | $\pm$ 0.04 | 2.35           | $\pm$ 0.1                | 2.57                | $\pm$ 0.11               | 2.34              | $\pm$ 0.06               |
| LVPWd (mm)  | 1.24            | $\pm$ 0.02 | 1.84           | $\pm$ 0.02 <sup>**</sup> | 1.56                | $\pm$ 0.10 <sup>##</sup> | 1.35              | $\pm$ 0.03 <sup>##</sup> |
| LVMI (g/mg) | 4.04            | $\pm$ 0.11 | 7.2            | $\pm$ 0.55 <sup>**</sup> | 6.37                | $\pm$ 0.82               | 5.23              | $\pm$ 0.25 <sup>#</sup>  |
| EF (%)      | 85.1            | $\pm$ 0.79 | 71.2           | $\pm$ 1.63 <sup>**</sup> | 79.5                | $\pm$ 1.79 <sup>##</sup> | 84.2              | $\pm$ 0.97 <sup>##</sup> |

\*  $p < 0.05$ , \*\*  $p < 0.01$  vs. Sham + vehicle group. <sup>#</sup> $p < 0.05$ , <sup>##</sup> $p < 0.01$  vs. TAC + vehicle group.

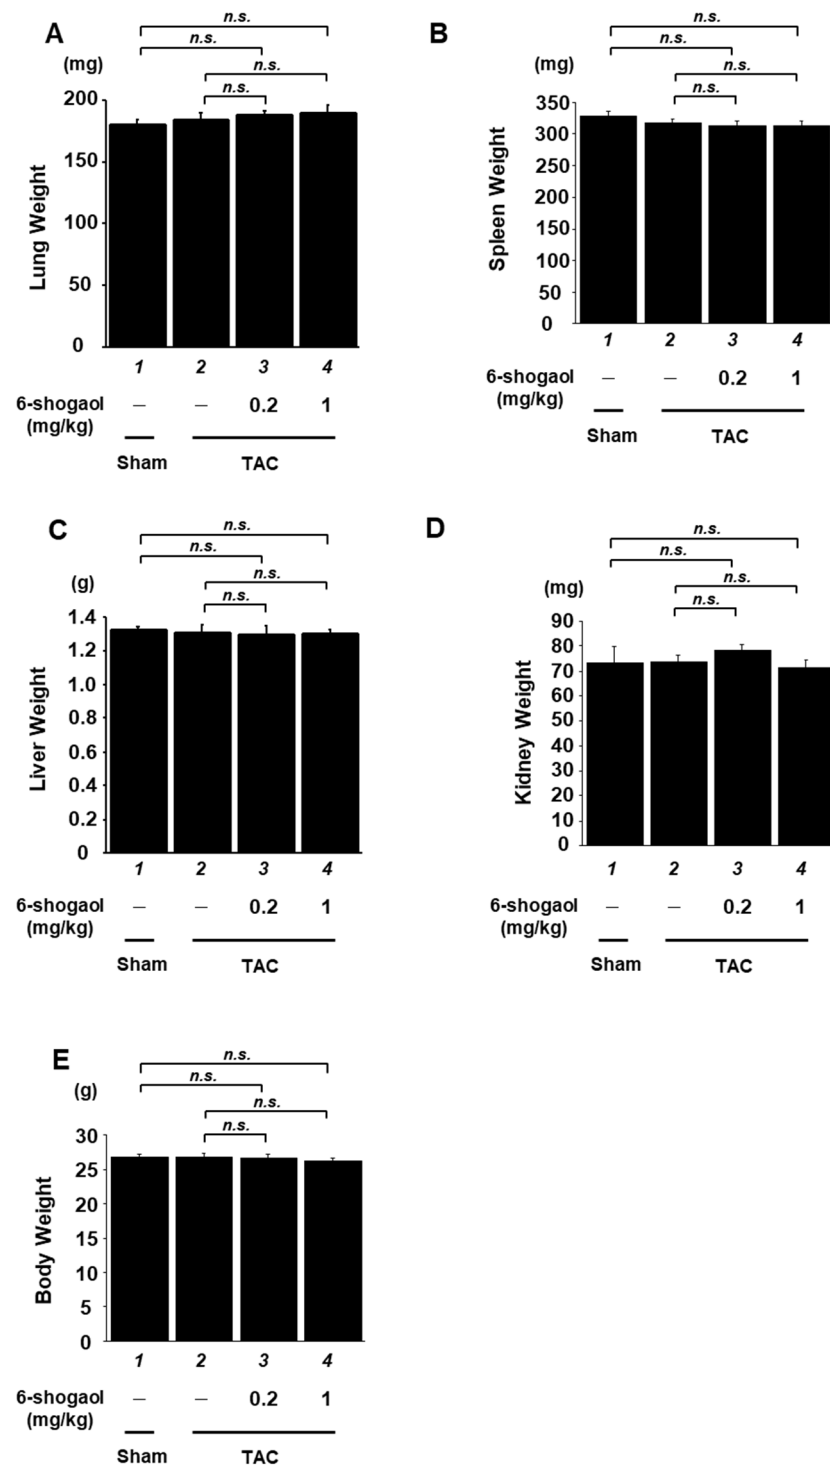

**Figure S1.** Organ weight and body weight of mice treated with 6-shogaol at doses of 0.2 or 1 mg/kg for 8 weeks. (A) Lung, (B) spleen, (C) liver, and (D) kidney were isolated from the sham and TAC groups at 8 weeks after surgery. (E) Body weight of each group was measured at 8 weeks after surgery. Data are presented as the mean  $\pm$  SEM of six individual experiments.
